# Inhaltsverzeichnis

|                                                                                                         |    |
|---------------------------------------------------------------------------------------------------------|----|
| Vorwort .....                                                                                           | V  |
| 1. Einleitung.....                                                                                      | 1  |
| 1.1. Problemstellung und Zielsetzung .....                                                              | 1  |
| 1.2. Sprache und Spracharbeit im juristischen Bereich:                                                  |    |
| Forschungsstand .....                                                                                   | 5  |
| 1.2.1. Vom Wort zum Textgeflecht.....                                                                   | 5  |
| 1.2.2. Relevante interdisziplinäre Forschungsansätze und<br>-gruppen für <i>Recht und Sprache</i> ..... | 11 |
| 1.2.3. Weitere Themenfelder und Literaturhinweise.....                                                  | 13 |
| 1.2.4. Zum Forschungsstand .....                                                                        | 14 |
| 1.3. Legitimation des Textkorpus .....                                                                  | 15 |
| 1.3.1. Aufbau des Korpus – Kriterien und Legitimation<br>der Auswahl .....                              | 16 |
| 1.3.2. Textsammlung .....                                                                               | 20 |
| 1.3.3. Technische Bereitstellung .....                                                                  | 22 |
| 1.4. Ab- und Eingrenzung der Untersuchung .....                                                         | 23 |
| 1.5. Aufbau und Gliederung der Arbeit .....                                                             | 24 |
| 2. Semantische und pragmatische Voraussetzungen.....                                                    | 27 |
| 2.1. Pragmatische Semantikauffassung .....                                                              | 27 |
| 2.2. Alltagssemantik und Fachsemantik .....                                                             | 31 |
| 2.2.1. Konstruktivistische, kognitive und varietäten-<br>linguistische Sichtweise.....                  | 32 |
| 2.2.2. Rechtssprache und juristische Semantik.....                                                      | 35 |
| 2.3. Semantische Kämpfe .....                                                                           | 37 |
| 2.4. Resümee .....                                                                                      | 41 |
| 3. Rechtslinguistische Ansätze .....                                                                    | 43 |
| 3.1. Strukturierende Rechtslehre – das Grundkonzept .....                                               | 43 |
| 3.1.1. Norm und Normtext .....                                                                          | 43 |
| 3.1.2. Normprogramm und Normbereich .....                                                               | 46 |
| 3.2. Juristische Textarbeit .....                                                                       | 49 |
| 3.2.1. Konkretisierung in fünf Textstufen .....                                                         | 49 |

|                                                                                                                                              |     |
|----------------------------------------------------------------------------------------------------------------------------------------------|-----|
| 3.2.2. Juristische Textarbeit anhand dreier grundlegender Sprachhandlungstypen . . . . .                                                     | 52  |
| 3.2.2.1. Sprachhandlungsklassen, Sprachhandlungstypen und Sprecherhandlungen . . . . .                                                       | 52  |
| 3.2.2.2. Drei grundlegende juristische Sprachhandlungstypen . . . . .                                                                        | 54  |
| 3.3. Resümee . . . . .                                                                                                                       | 57  |
| 4. Text- und diskurslinguistische Ansätze . . . . .                                                                                          | 59  |
| 4.1. Text und Diskurs . . . . .                                                                                                              | 59  |
| 4.1.1. Begriffliche und methodische Grundlage . . . . .                                                                                      | 59  |
| 4.1.2. Juristische Textsorten und die Diskurskonstellation. . . . .                                                                          | 63  |
| 4.2. Perspektivität . . . . .                                                                                                                | 67  |
| 4.3. Das Modell der perspektivitätsorientierten Textanalyse . . . . .                                                                        | 70  |
| 4.4. Resümee . . . . .                                                                                                                       | 82  |
| 5. Zum Gegenstand der juristischen Kontroverse . . . . .                                                                                     | 85  |
| 5.1. Skizzierung der Kontroverse im juristischen Kontext. . . . .                                                                            | 85  |
| 5.2. Die Rechtsfälle im Überblick . . . . .                                                                                                  | 87  |
| 6. Streitige Sprecherhandlungen im Rahmen grundlegender Sprachhandlungstypen – anhand der Kontroverse zwischen BGH und OLG Koblenz . . . . . | 95  |
| 6.1. Sachverhalt-Festsetzen. . . . .                                                                                                         | 96  |
| 6.1.1. Fallorientiertes Sachverhalt-Festsetzen . . . . .                                                                                     | 97  |
| 6.1.1.1. Festsetzungen in Bezug auf das objektivierte Ereignis . . . . .                                                                     | 97  |
| 6.1.1.2. Festsetzungen in Bezug auf subjektive Einstellungen . . . . .                                                                       | 101 |
| 6.1.2. Prozessorientiertes Sachverhalt-Festsetzen. . . . .                                                                                   | 104 |
| 6.2. Rechtliche Klassifizierung. . . . .                                                                                                     | 106 |
| 6.2.1. Sachverhaltsklassifizierung . . . . .                                                                                                 | 107 |
| 6.2.2. Klassifizierung der Rechtsklassifikation . . . . .                                                                                    | 116 |
| 6.2.3. Klassifizierung argumentativ relevanter Umstände. . . . .                                                                             | 117 |
| 6.3. Rechtliche Beurteilung inklusive Argumentation. . . . .                                                                                 | 118 |
| 6.3.1. Realisierte Sprecherhandlungen . . . . .                                                                                              | 119 |
| 6.3.1.1. Rechtliche Beurteilung . . . . .                                                                                                    | 119 |
| 6.3.1.2. Argumentation . . . . .                                                                                                             | 120 |
| 6.3.1.2.1. Berufung auf den Sprachgebrauch . . . . .                                                                                         | 120 |
| 6.3.1.2.2. Berufung auf die Gesetzssystematik. . . . .                                                                                       | 134 |
| 6.3.1.2.3. Berufung auf andere Rechtsprechungen . . . . .                                                                                    | 136 |

|                                                                                                                                                                      |     |
|----------------------------------------------------------------------------------------------------------------------------------------------------------------------|-----|
| 6.3.1.2.4. Berufung auf den Gesetzgeberwillen ..                                                                                                                     | 139 |
| 6.3.1.2.5. Berufung auf andere Rechtssysteme<br>und Textsorten .....                                                                                                 | 145 |
| 6.3.2. Das sprachliche Handeln der Rechtsarbeiter –<br>linguistische Reflexionen .....                                                                               | 147 |
| 6.3.2.1. Sprachgebrauch und Textkorpora .....                                                                                                                        | 147 |
| 6.3.2.2. Konkurrenzbeziehung zwischen verschiedenen<br>Sorten des Sprachgebrauchs aus unter-<br>schiedlichen Diskursrahmen .....                                     | 151 |
| 6.4. Resümee .....                                                                                                                                                   | 152 |
| 7. Untersuchungsergebnisse weiterer Rechtsfälle .....                                                                                                                | 157 |
| 7.1. Sachverhalt-Festsetzen .....                                                                                                                                    | 157 |
| 7.1.1. Fallorientiertes Sachverhalt-Festsetzen .....                                                                                                                 | 157 |
| 7.1.1.1. Festsetzungen in Bezug auf das objektivierte<br>Ereignis .....                                                                                              | 157 |
| 7.1.1.2. Festsetzungen in Bezug auf subjektive<br>Einstellungen .....                                                                                                | 163 |
| 7.1.2. Prozessorientiertes Sachverhalt-Festsetzen .....                                                                                                              | 169 |
| 7.2. Rechtliche Klassifizierung .....                                                                                                                                | 172 |
| 7.2.1. Sachverhaltsklassifizierung .....                                                                                                                             | 172 |
| 7.2.2. Klassifizierung der Rechtsklassifikation .....                                                                                                                | 182 |
| 7.2.3. Klassifizierung argumentativ relevanter Umstände .....                                                                                                        | 184 |
| 7.3. Rechtliche Beurteilung inklusive Argumentation .....                                                                                                            | 184 |
| 7.3.1. Rechtliche Beurteilung .....                                                                                                                                  | 184 |
| 7.3.2. Argumentation .....                                                                                                                                           | 186 |
| 7.3.2.1. Berufung auf den Sprachgebrauch .....                                                                                                                       | 186 |
| 7.3.2.2. Berufung auf die Gesetzssystematik .....                                                                                                                    | 198 |
| 7.3.2.3. Berufung auf andere Rechtsprechungen .....                                                                                                                  | 198 |
| 7.3.2.4. Berufung auf den Gesetzgeberwillen .....                                                                                                                    | 200 |
| 7.3.2.5. Berufung auf andere Rechtssysteme<br>bzw. Rechtsvorschriften .....                                                                                          | 204 |
| 7.4. Resümee .....                                                                                                                                                   | 206 |
| 8. Zusammenfassung der Untersuchungsergebnisse bezüglich<br>der Perspektivierungsversuche im Lichte des Modells<br>der perspektivitätsorientierten Textanalyse ..... | 209 |
| 8.1. Ebene der Lexik und der Syntagmen .....                                                                                                                         | 210 |
| 8.1.1. Benennungskonkurrenz .....                                                                                                                                    | 210 |
| 8.1.2. Bedeutungskonkurrenz .....                                                                                                                                    | 212 |
| 8.2. Ebene des Satzes bzw. der Äußerungseinheit .....                                                                                                                | 213 |
| 8.2.1. Perspektivität im Bereich grammatischer Grundformen ..                                                                                                        | 213 |

|                                                                                                      |     |
|------------------------------------------------------------------------------------------------------|-----|
| 8.2.2. Perspektivität im Bereich der Verknüpfungszeichen . . . . .                                   | 214 |
| 8.2.3. Perspektivität im Bereich der Kommentierungszeichen . . . . .                                 | 222 |
| 8.3. Ebene des Textes. . . . .                                                                       | 225 |
| 8.3.1. Gewichtung . . . . .                                                                          | 225 |
| 8.3.2. Reformulierung. . . . .                                                                       | 225 |
| 8.4. Resümee – Linguistische Reflexionen über den Rechtsstreit<br>und die Rechtssicherheit . . . . . | 232 |
| 9. Schlusswort . . . . .                                                                             | 235 |
| 9.1. Bilanzierung der vorliegenden Untersuchung. . . . .                                             | 235 |
| 9.2. Zusammenfassende Thesen . . . . .                                                               | 239 |
| Literaturverzeichnis . . . . .                                                                       | 243 |
| 1. Monographien und Aufsätze . . . . .                                                               | 243 |
| 2. Wörterbücher, Gesetzestexte und andere Dokumente . . . . .                                        | 250 |
| Anhang 1: Abkürzungsverzeichnis . . . . .                                                            | 251 |
| Anhang 2: Detaillierter Bestand des Textkorpus . . . . .                                             | 252 |
